# Supplementary material for: Geographic and Temporal Patterns in Covid-19 Mortality by Race and Ethnicity in the United States from March 2020 to February 2022
Source: PubMed Central journal article supplement — medRxiv. 2022 Jul 21:2022.07.20.22277872. Preprint. [Version 1] doi: 10.1101/2022.07.20.22277872 (PMC9327633; doi:10.1101/2022.07.20.22277872), 2022-07-21
Supplement: NIHPP2022.07.20.22277872v1-supplement-1.pdf [file NIHPP2022.07.20.22277872v1-supplement-1.pdf]

**SUPPLEMENTAL TABLES/FIGURES:**

**Table S1.** Changes in Age-Standardized Covid-19 Death Rates by Race/Ethnicity across Combinations of Census Regions and Metro-Nonmetro Categories, March 2020-February 2021 to March 2021-February 2022

| Region    | Metro-Nonmetro Category | Race/Ethnicity | Age-Standardized Death Rates |        | Percent Change in Death Rates, Year 1 to Year 2 | Rate Ratios |        | Percent Change in Rate Ratios, Year 1 to Year 2 |
|-----------|-------------------------|----------------|------------------------------|--------|-------------------------------------------------|-------------|--------|-------------------------------------------------|
|           |                         |                | Year 1                       | Year 2 |                                                 | Year 1      | Year 2 |                                                 |
| Midwest   | Large Metro             | Hispanic       | 257                          | 126    | -51%                                            | 1.92        | 1.08   | -44%                                            |
|           | Large Metro             | NH Black       | 245                          | 182    | -26%                                            | 1.83        | 1.57   | -14%                                            |
|           | Large Metro             | NH White       | 134                          | 116    | -13%                                            | Ref         | Ref    | Ref                                             |
|           | Medium/Small Metro      | Hispanic       | 199                          | 158    | -21%                                            | 1.40        | 1.20   | -14%                                            |
|           | Medium/Small Metro      | NH Black       | 246                          | 221    | -10%                                            | 1.73        | 1.68   | -3%                                             |
|           | Medium/Small Metro      | NH White       | 142                          | 132    | -8%                                             | Ref         | Ref    | Ref                                             |
|           | Nonmetro                | Hispanic       | 233                          | 154    | -34%                                            | 1.46        | 0.96   | -34%                                            |
|           | Nonmetro                | NH Black       | 254                          | 183    | -28%                                            | 1.59        | 1.15   | -28%                                            |
|           | Nonmetro                | NH White       | 160                          | 160    | 0%                                              | Ref         | Ref    | Ref                                             |
| Northeast | Large Metro             | Hispanic       | 356                          | 107    | -70%                                            | 2.01        | 1.21   | -40%                                            |
|           | Large Metro             | NH Black       | 342                          | 139    | -59%                                            | 1.93        | 1.57   | -19%                                            |
|           | Large Metro             | NH White       | 177                          | 89     | -50%                                            | Ref         | Ref    | Ref                                             |
|           | Medium/Small Metro      | Hispanic       | 232                          | 121    | -48%                                            | 1.59        | 1.16   | -27%                                            |
|           | Medium/Small Metro      | NH Black       | 275                          | 162    | -41%                                            | 1.88        | 1.55   | -18%                                            |
|           | Medium/Small Metro      | NH White       | 146                          | 105    | -28%                                            | Ref         | Ref    | Ref                                             |
|           | Nonmetro                | Hispanic       | 96                           | 93     | -3%                                             | 0.91        | 0.70   | -23%                                            |
|           | Nonmetro                | NH Black       | 169                          | 173    | 3%                                              | 1.61        | 1.31   | -18%                                            |

|       |                    |          |     |     |      |      |      |      |
|-------|--------------------|----------|-----|-----|------|------|------|------|
|       | Nonmetro           | NH White | 105 | 132 | 26%  | Ref  | Ref  | Ref  |
|       | Large Metro        | Hispanic | 217 | 160 | -27% | 1.92 | 1.33 | -31% |
|       | Large Metro        | NH Black | 198 | 166 | -16% | 1.75 | 1.38 | -21% |
|       | Large Metro        | NH White | 113 | 120 | 6%   | Ref  | Ref  | Ref  |
| South | Medium/Small Metro | Hispanic | 311 | 181 | -42% | 2.45 | 1.18 | -52% |
|       | Medium/Small Metro | NH Black | 237 | 186 | -21% | 1.86 | 1.21 | -35% |
|       | Medium/Small Metro | NH White | 127 | 154 | 21%  | Ref  | Ref  | Ref  |
|       | Nonmetro           | Hispanic | 374 | 230 | -38% | 2.06 | 1.07 | -48% |
|       | Nonmetro           | NH Black | 323 | 213 | -34% | 1.78 | 0.99 | -44% |
|       | Nonmetro           | NH White | 181 | 215 | 18%  | Ref  | Ref  | Ref  |
| West  | Large Metro        | Hispanic | 325 | 128 | -61% | 3.23 | 1.59 | -51% |
|       | Large Metro        | NH Black | 192 | 138 | -28% | 1.91 | 1.71 | -10% |
|       | Large Metro        | NH White | 101 | 81  | -20% | Ref  | Ref  | Ref  |
|       | Medium/Small Metro | Hispanic | 262 | 163 | -38% | 3.01 | 1.45 | -52% |
|       | Medium/Small Metro | NH Black | 165 | 140 | -15% | 1.89 | 1.25 | -34% |
|       | Medium/Small Metro | NH White | 87  | 112 | 29%  | Ref  | Ref  | Ref  |
|       | Nonmetro           | Hispanic | 202 | 201 | -1%  | 2.69 | 1.41 | -48% |
|       | Nonmetro           | NH Black | 93  | 110 | 19%  | 1.23 | 0.78 | -37% |
|       | Nonmetro           | NH White | 75  | 142 | 89%  | Ref  | Ref  | Ref  |

NH = Non-Hispanic

Notes: Death rates were age-standardized using 3 age groups (0-54, 55-74 and 75+) and the overall U.S. 2020 population as the standard population. Year 1 refers to March 2020 to February 2021, and year two refers to March 2021 to February 2022. Data was imputed for one or more age categories for NH Black in year 1 in nonmetro areas in the Northeast and West and for Hispanic in year 1 in nonmetro areas in the Northeast because death counts were between 1 and 9 for one or more age categories and were thus suppressed by CDC WONDER.

**Figure S1. Age-Standardized Covid-19 Death Rates by Race/Ethnicity across Census Regions by Month from March 2020 to February 2022**

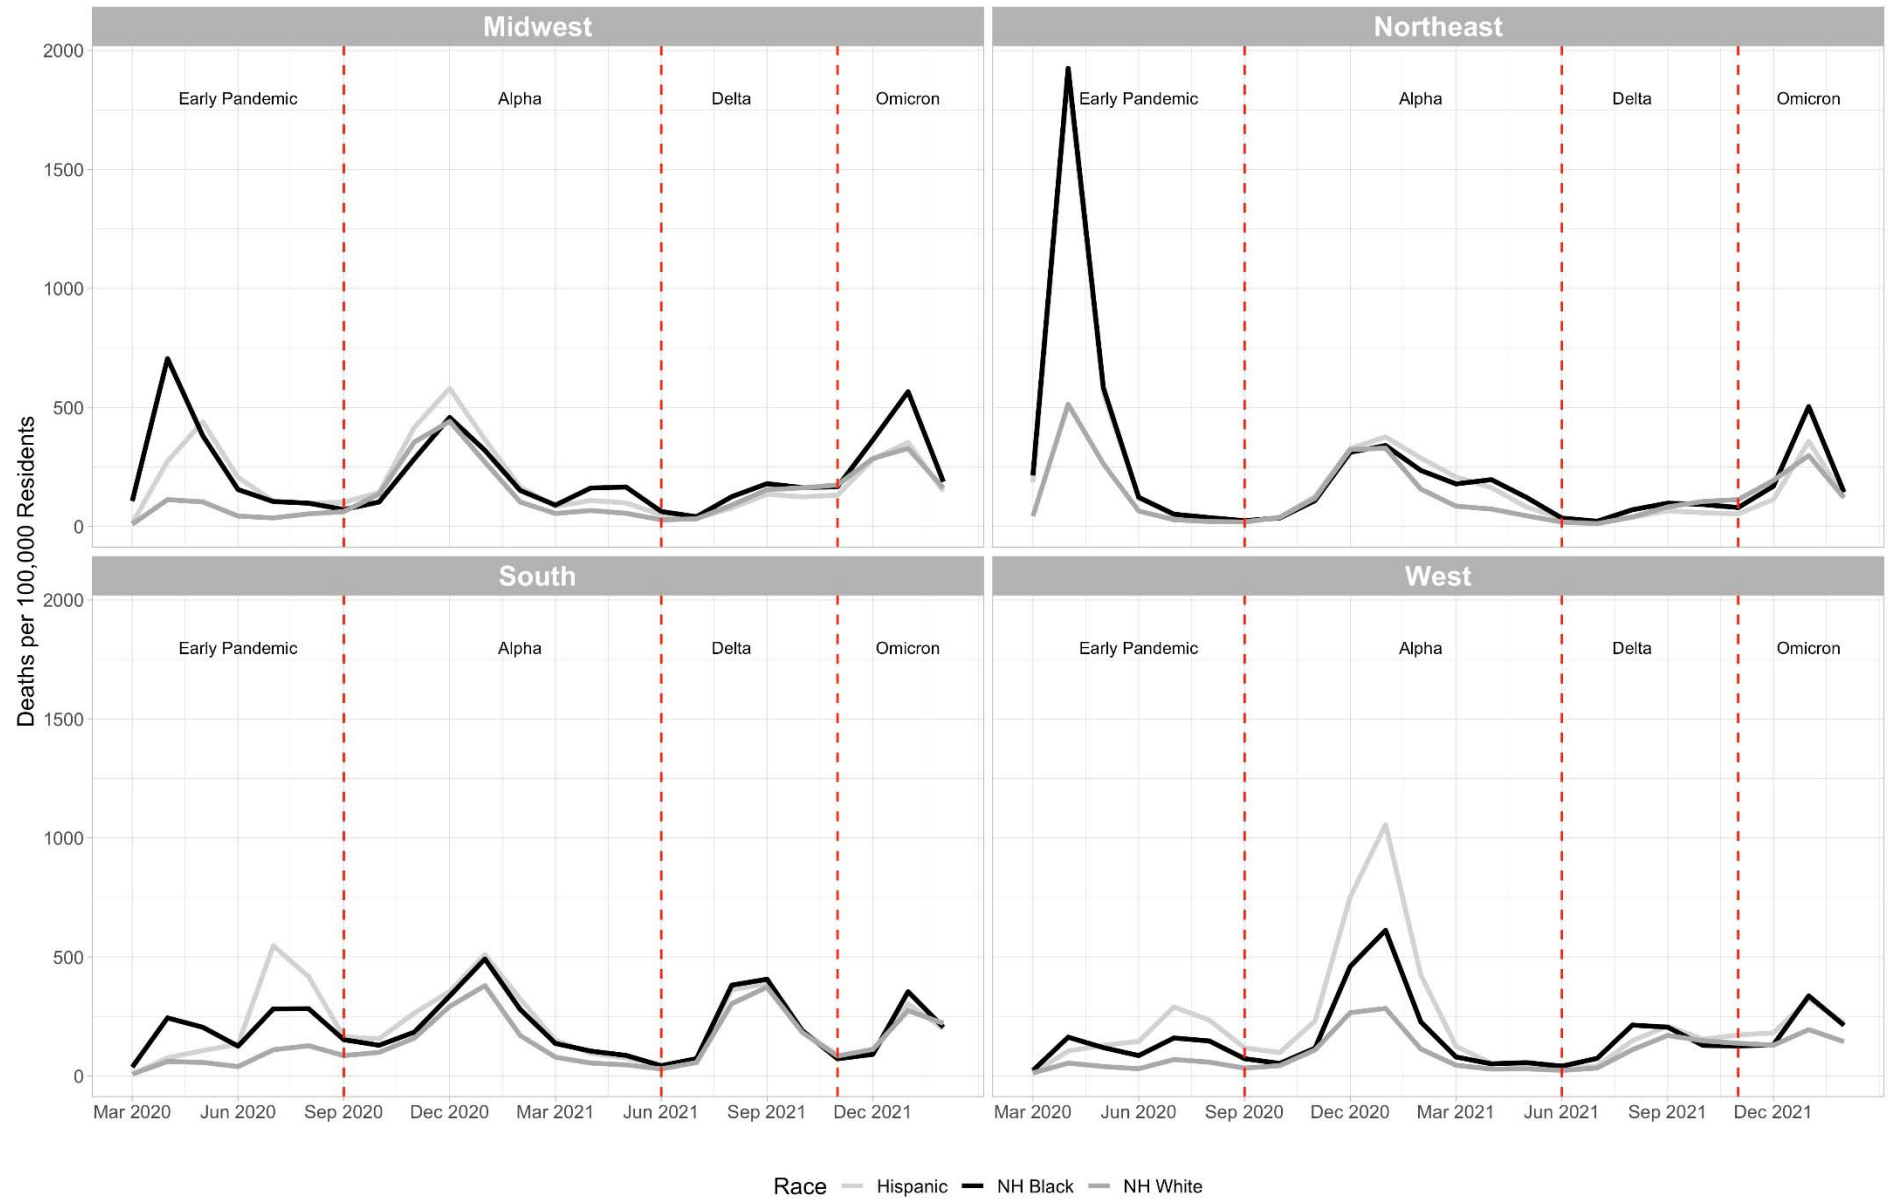

NH = Non-Hispanic

Notes: Death rates were age-standardized using 3 age groups (0-54, 55-74 and 75+) and the overall U.S. 2020 population as the standard population. Data was imputed for one or more age categories for Hispanic residents in the Midwest in March 2020 because death counts were between 1 and 9 for one or more age categories and were thus suppressed by CDC WONDER.

## METHODS SUPPLEMENT

### Data Sources & Extraction Procedure:

#### Mortality Data

Data Source:

CDC WONDER (<https://wonder.cdc.gov/mcd-icd10-provisional.html>)

Rationale for Querying Approach:

While it is possible to query CDC WONDER for mortality data by sorting with variables such as ethnicity, race, 10-year age groups, urbanization, region, month, and year, sorting by these variables reduces the data into smaller cells than required for the analysis, resulting in unnecessary data suppression since death counts between 1 and 9 are suppressed. Thus, it is critical to submit separate queries for each piece of data needed so that no unnecessary suppression occurs, especially for racial/ethnic groups with smaller populations. In total, 192 CDC WONDER queries are needed to extract all the data needed for this analysis.

CDC WONDER Query #1 (Table 1 and Figure 1):

Covid-19 Mortality by Race/Ethnicity, Urbanization and Year (36 Files Total)

- Use Multiple Cause Provisional Mortality Statistics, 2018 through Last Month
- Select Multiple Cause of Death (Any Mention on Death Certificate): Covid-19 (U07.1)
- Select Show Zero Values and Suppressed Values
- Select Months (Separate Files for Each)
  - March 2020 to February 2021
  - March 2021 to February 2022
- Select 2013 Urbanization (by Residence) Categories (Separate Files for Each)
  - Nonmetro (Noncore (Nonmetro) and Micropolitan (Nonmetro))
  - Small/Medium Metro (Small Metro and Medium Metro)
  - Large Metro (Large Fringe Metro and Large Central Metro)
- Select 10-Year Age Categories (Separate Files for Each)
  - Ages 0-54
  - Ages 55-74
  - Ages 75+
- Select Race/Ethnicity (Separate files for Each)
  - Select Hispanic and All Races
  - Select Non-Hispanic and All Races and Group by Single Race 6

CDC WONDER Query #2 (Table 1 and Figure 1):

Covid-19 Mortality by Race/Ethnicity, Census Region and Year (12 Files Total)

- Use Multiple Cause Provisional Mortality Statistics, 2018 through Last Month
- Select Multiple Cause of Death (Any Mention on Death Certificate): Covid-19 (U07.1)
- Select Show Zero Values and Suppressed Values
- Select Months (Separate Files for Each)
  - March 2020 to February 2021
  - March 2021 to February 2022
- Select 10-Year Age Categories (Separate Files for Each)
  - Ages 0-54

- Ages 55-74
- Ages 75+
- Specify Race/Ethnicity (Separate files for Each)
  - Select Hispanic and All Races
  - Select Non-Hispanic and All Races and Group by Single Race 6
- Group by Census Region (by Residence)

CDC WONDER Query #3 (Figure 2 and Table S1):

Covid-19 Mortality by Race/Ethnicity, Census Region, Metro-Nonmetro Category and Year (54 Files Total)

- Use Multiple Cause Provisional Mortality Statistics, 2018 through Last Month
- Select Multiple Cause of Death (Any Mention on Death Certificate): Covid-19 (U07.1)
- Select Show Zero Values and Suppressed Values
- Select Months (Separate Files for Each)
  - March 2020 to February 2021
  - March 2021 to February 2022
- Select 2013 Urbanization (by Residence) Categories (Separate Files for Each)
  - Nonmetro (Noncore (Nonmetro) and Micropolitan (Nonmetro))
  - Small/Medium Metro (Small Metro and Medium Metro)
  - Large Metro (Large Fringe Metro and Large Central Metro)
- Select 10-Year Age Categories (Separate Files for Each)
  - Ages 0-54
  - Ages 55-74
  - Ages 75+
- Specify Race/Ethnicity (Separate files for Each)
  - Select Hispanic and All Races
  - Select Non-Hispanic and Black or African American
  - Select Non-Hispanic and White
- Group by Census Region

CDC WONDER Query #4 (Figure 4):

Covid-19 Mortality by Race/Ethnicity, Urbanization and Month (27 Files Total)

- Use Multiple Cause Provisional Mortality Statistics, 2018 through Last Month
- Select Multiple Cause of Death (Any Mention on Death Certificate): Covid-19 (U07.1)
- Select Show Zero Values and Suppressed Values
- Select Months March 2020 to February 2022
- Select 2013 Urbanization (By Residence) Categories (Separate Files for Each)
  - Nonmetro (Noncore (Nonmetro) and Micropolitan (Nonmetro))
  - Small/Medium Metro (Small Metro and Medium Metro)
  - Large Metro (Large Fringe Metro and Large Central Metro)
- Select 10-Year Age Categories (Separate Files for Each)
  - Ages 0-54
  - Ages 55-74
  - Ages 75+
- Select Race/Ethnicity (Separate files for Each)
  - Select Hispanic and All Races
  - Select Non-Hispanic and Black or African American
  - Select Non-Hispanic and White
- Group by Month

#### CDC WONDER Query #5 (Figure 3 and Figure 5):

##### Covid-19 Mortality by Race/Ethnicity, Census Division, Metro-Nonmetro Category and Year (54 Files Total)

- Use Multiple Cause Provisional Mortality Statistics, 2018 through Last Month
- Select Multiple Cause of Death (Any Mention on Death Certificate): Covid-19 (U07.1)
- Select Show Zero Values and Suppressed Values
- Select Months (Separate Files for Each)
  - March 2020 to February 2021
  - March 2021 to February 2022
- Select 2013 Urbanization (By Residence) Categories (Separate Files for Each)
  - Nonmetro (Noncore (Nonmetro) and Micropolitan (Nonmetro))
  - Small/Medium Metro (Small Metro and Medium Metro)
  - Large Metro (Large Fringe Metro and Large Central Metro)
- Select 10-Year Age Categories (Separate Files for Each)
  - Ages 0-54
  - Ages 55-74
  - Ages 75+
- Specify Race/Ethnicity (Separate files for Each)
  - Select Hispanic and All Races
  - Select Non-Hispanic and Black or African American
  - Select Non-Hispanic and White
- Group by Census Division (By Residence)

#### CDC WONDER Query #6 (Figure S1):

##### Covid-19 Mortality by Race/Ethnicity, Region and Month (9 Files Total)

- Use Multiple Cause Provisional Mortality Statistics, 2018 through Last Month
- Select Multiple Cause of Death (Any Mention on Death Certificate): Covid-19 (U07.1)
- Select Show Zero Values and Suppressed Values
- Select Months March 2020 to February 2022
- Select 10-Year Age Categories (Separate Files for Each)
  - Ages 0-54
  - Ages 55-74
  - Ages 75+
- Select Race/Ethnicity (Separate files for Each)
  - Select Hispanic and All Races
  - Select Non-Hispanic and Black or African American
  - Select Non-Hispanic and White
- Group by Census Region (By Residence) and Month

#### Population Data

##### Data Source:

U.S. Census 2021 Vintage Population Estimates (<https://www2.census.gov/programs-surveys/popest/datasets/2020-2021/counties/asrh/cc-est2021-all.csv>)

Data Dictionary (<https://www2.census.gov/programs-surveys/popest/technical-documentation/file-layouts/2020-2021/cc-est2021-alldata.pdf>)

This file provides county-level estimates of population by race/ethnicity and age, which can be aggregated to the levels of metro-nonmetro categories, Census regions, and states. Querying CDC WONDER by county and metro-nonmetro category, Census region, or state will generate the necessary crosswalks for aggregation.

Non-bridged race categories (Hispanic, non-Hispanic AIAN alone, non-Hispanic Asian alone, non-Hispanic NHOPI alone, non-Hispanic Black alone, and non-Hispanic white alone) were used for this analysis. Bridged race estimates are not yet available for 2021 and 2022 mortality data.

### Vaccination Data

Data Source:

CDC Covid-19 Vaccination Data by County (<https://data.cdc.gov/Vaccinations/COVID-19-Vaccinations-in-the-United-States-County/8xkx-amqh/data>)

The relevant variable is percent of the county fully vaccinated (Series\_Complete\_Pop\_Pct), as of February 28, 2022.

---

### **Age-Standardization Procedure:**

The U.S. 2020 population was used as the standard population. 70.3% of the population was between the ages of 0 to 54 years, 22.7% was between the ages of 55 to 74 years, and 7.0% was 75 years or older.

For each geographic and temporal unit, age-specific death rates were calculated for ages 0-54, 55-74, and 75+. Each age-specific death rate was multiplied by the corresponding percentage of the population in that age group, and then the 3 components were added together to produce the age-standardized death rate.

It was not possible to use 10-year age intervals for age-standardization due to data suppression.

---
